# Supplementary material for: Characterization of Asparagine Deamidation in Immunodominant Myelin Oligodendrocyte Glycoprotein Peptide Potential Immunotherapy for the Treatment of Multiple Sclerosis
Source: MDPI journal article supplement (doi:10.3390/ijms21207566), 2020-10-13
Supplement: s1 [file s1]

## **Supplementary Materials**

### **Characterization of Asparagine Deamidation in Immunodominant Myelin Oligodendrocyte Glycoprotein Peptide Potential Immunotherapy for the Treatment of Multiple Sclerosis**

**RP-HPLC Conditions:**

- i) Temperature: 25 °C
- ii) Column: Purospher RP-18 (5µm, Hibar 100-4, 6 mm),
- iii) Solvents: H<sub>2</sub>O (0.08% TFA), AcN (0.08% TFA),
- iv) Gradient elution: from 18% AcN to 40% AcN over 30 min

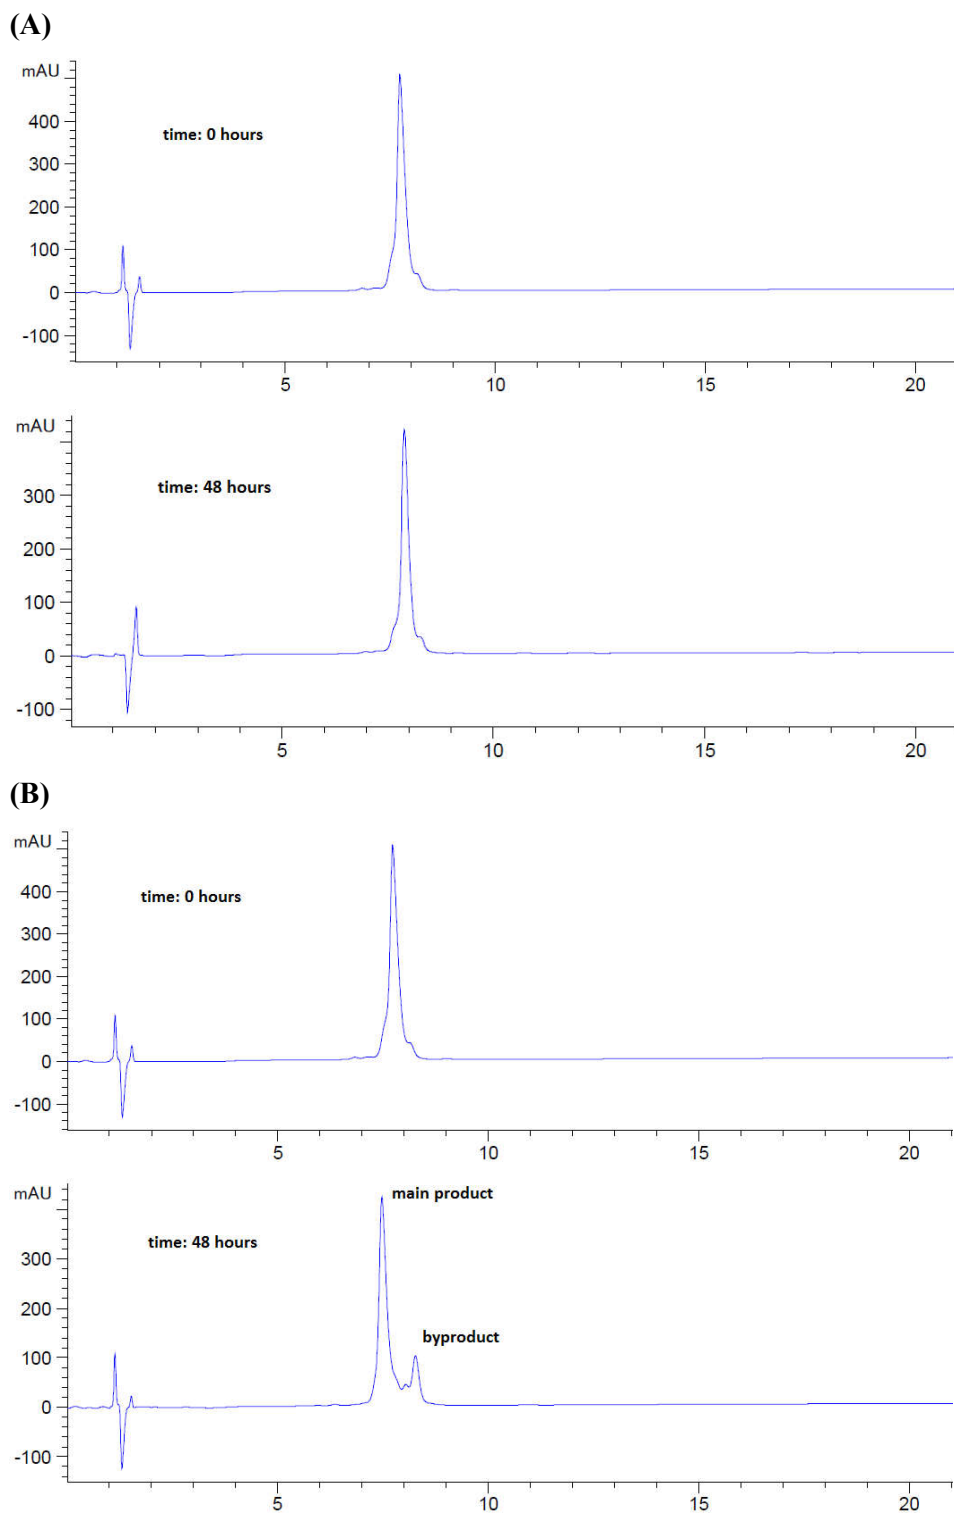

**Figure S1:** RP-HPLC chromatogram of Pep 1 (MOG<sub>4155</sub>) at 214.4 nm, at time zero and 48 h after dilution; **(A)** dissolved in water, **(B)** dissolved in bicarbonate buffer pH 9.0

$t_R$  (main product): 7.47 min (83.1%) and  $t_R$  (byproduct): 8.27 min (13.9%)

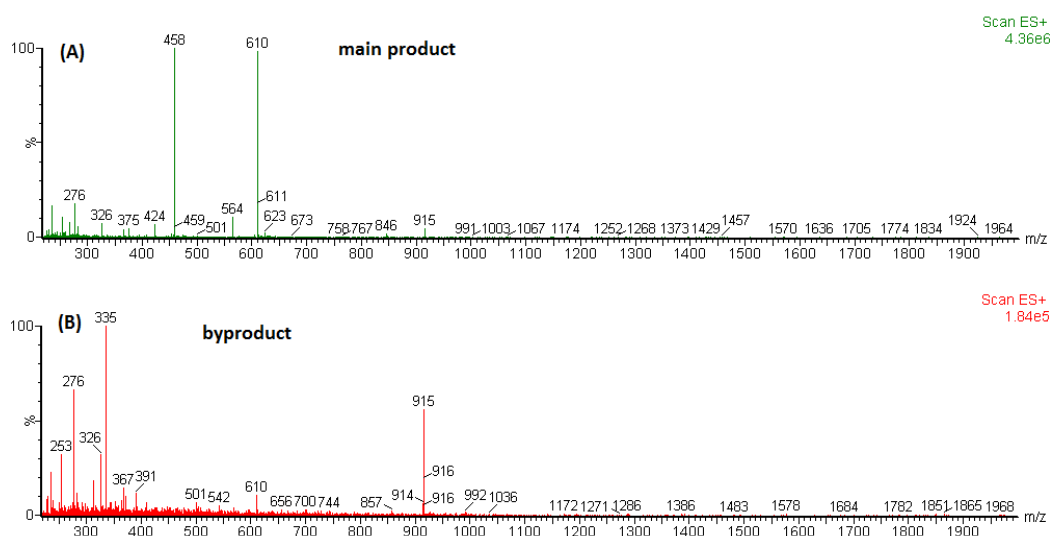

**Figure S2:** ESI-MS spectra of **Pep 1** (MOG<sub>4155</sub>) dissolved in bicarbonate buffer, pH 9.0; of main product **(A)** and byproduct **(B)**

MW theoretical (main product): 1826.12 Da

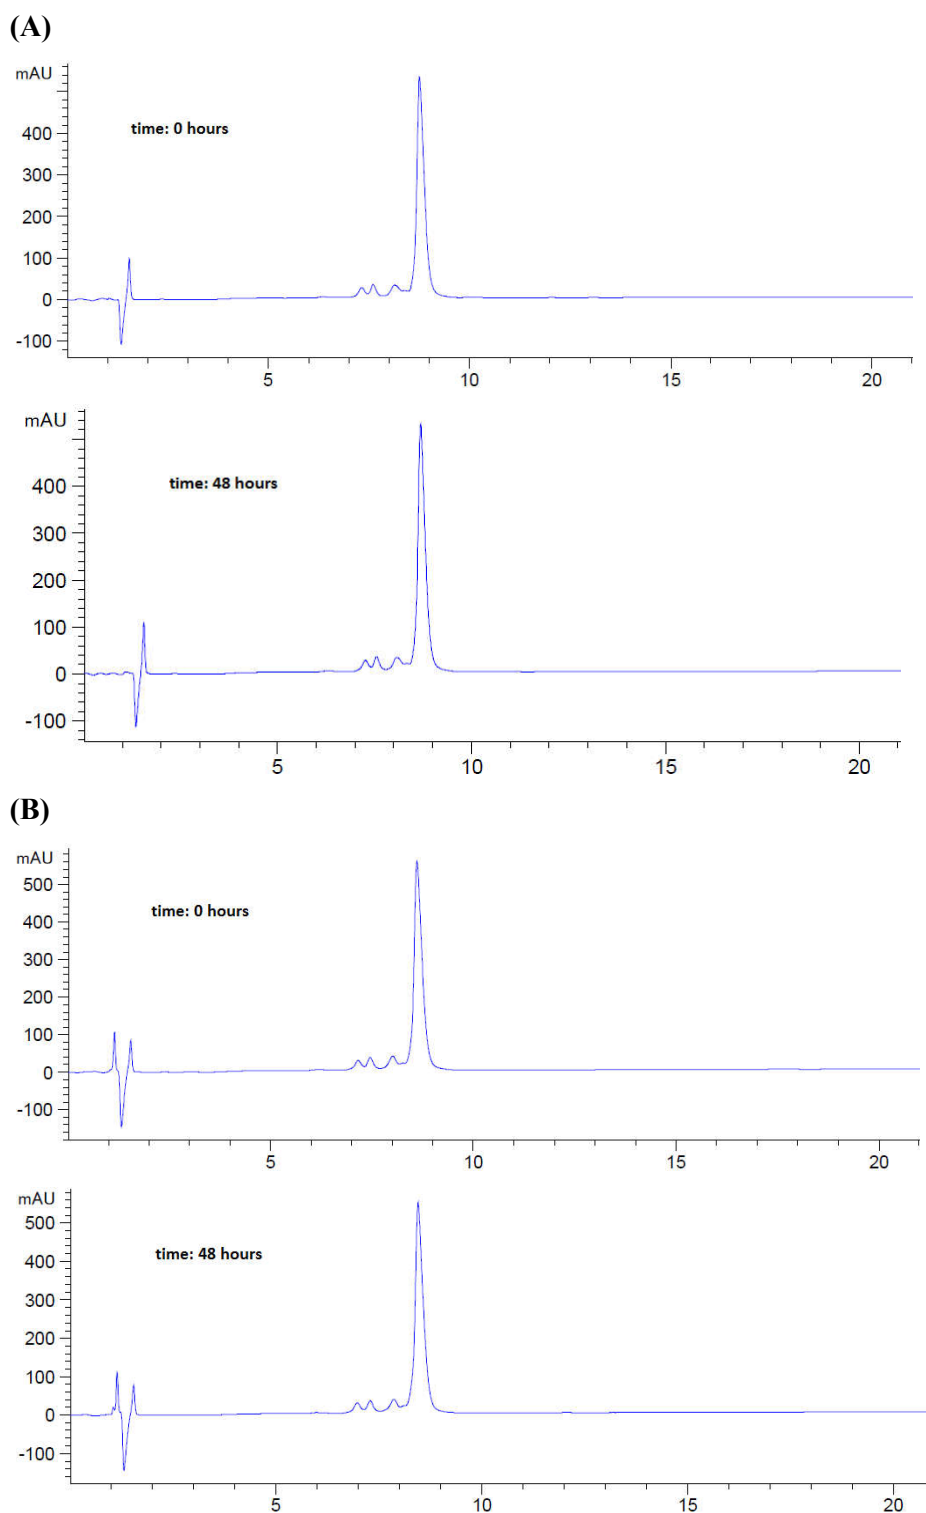

**Figure S3:** RP-HPLC chromatogram of **Pep 2** [MOG<sub>4155</sub> (Ala<sup>53</sup>)] at 214.4 nm, at time zero and 48 h after dilution; **(A)** dissolved in water, **(B)** dissolved in bicarbonate buffer pH 9.0

$t_R$  (main product): 8.45 min (100%) and  $t_R$  (byproduct): do not observed

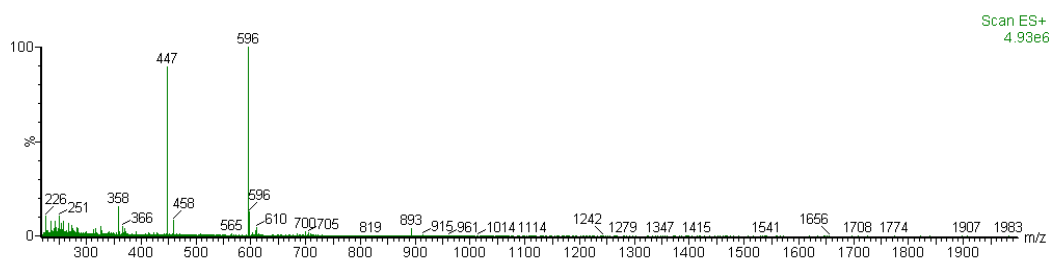

**Figure S4:** ESI-MS spectra of **Pep 2** [MOG<sub>4155</sub> (Ala<sup>53</sup>)]

MW<sub>theoretical</sub> (main product): 1783.11 Da

**(A)**

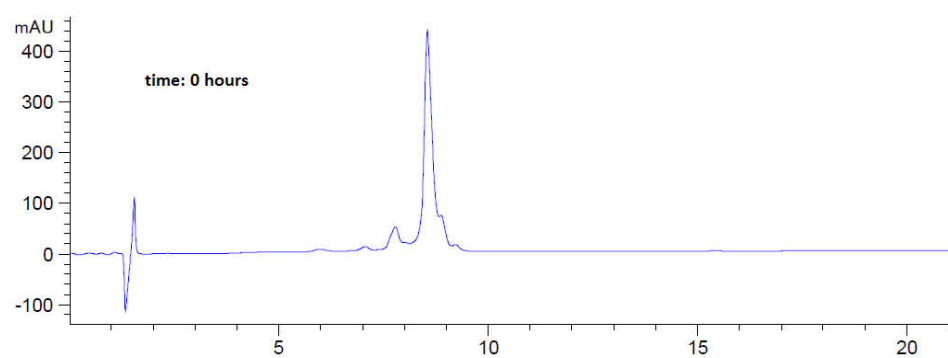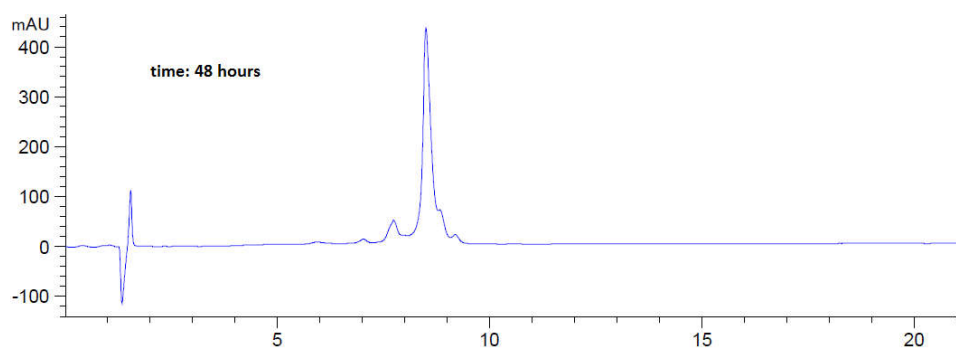

**(B)**

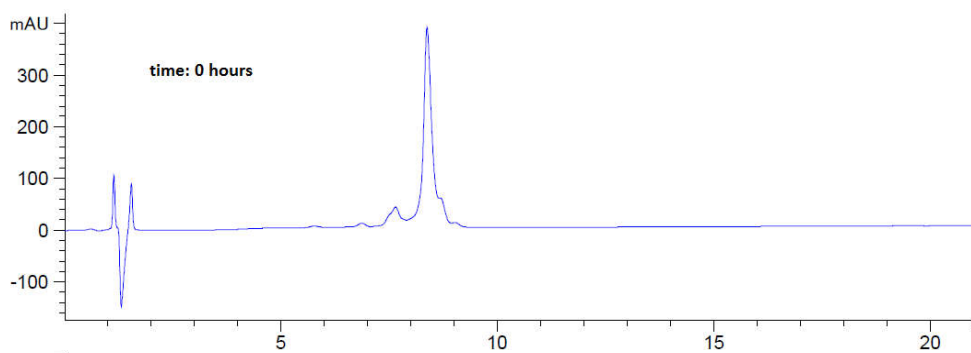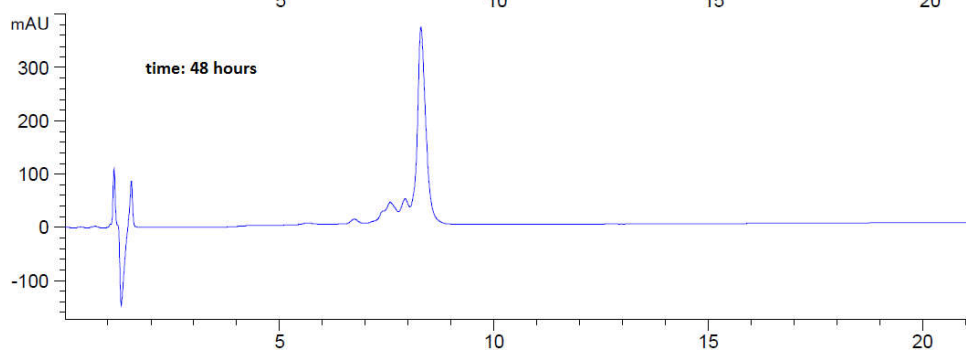

(C)

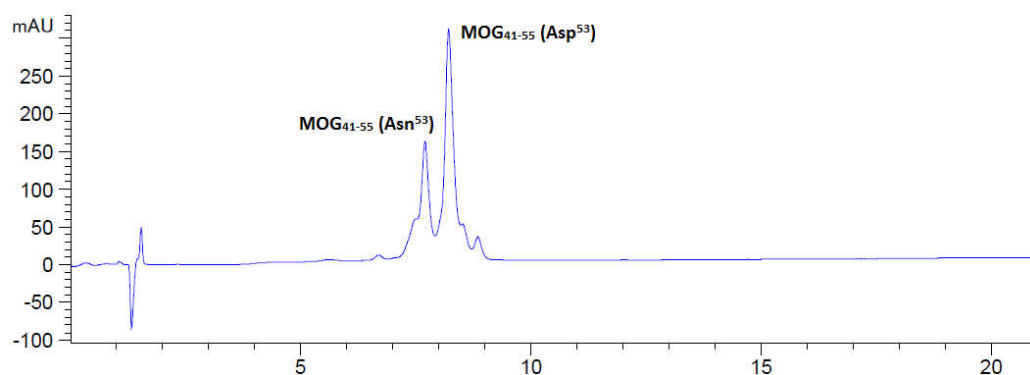

**Figure S5:** RP-HPLC chromatogram of **Pep 3** [MOG<sub>4155</sub> (Asp<sup>53</sup>)] at 214.4 nm, at time zero and 48 h after dilution; (A) dissolved in water, (B) dissolved in bicarbonate buffer pH 9.0;  $t_R$  (main product): 8.3 min (100%) and  $t_R$  (byproduct): do not observed (C) RP-HPLC chromatogram after co-injection of MOG<sub>4155</sub> (**Pep 1**) (dissolved in bicarbonate buffer) and MOG<sub>4155</sub> (Asp<sup>53</sup>) (**Pep 3**) (dissolved in water) at 214.4 nm

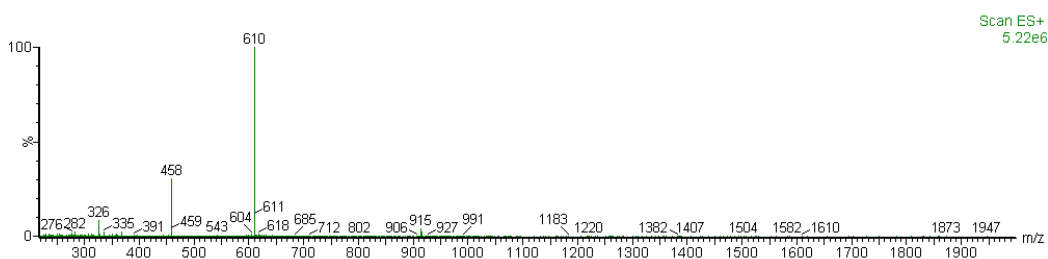

**Figure S6:** ESI-MS spectra of **Pep 3** [MOG<sub>4155</sub> (Asp<sup>53</sup>)]

MW theoretical (main product): 1827.12 Da

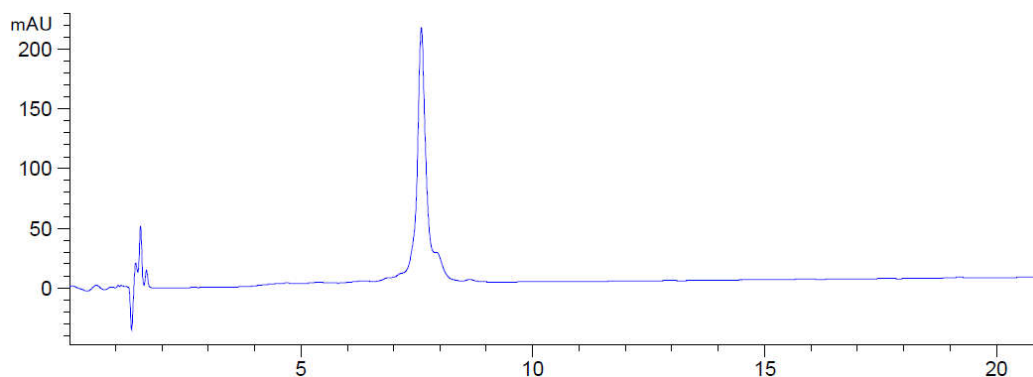

**Figure S7:** RP-HPLC chromatogram of **Pep 4** [MOG<sub>4155</sub> (isoAsp<sup>53</sup>)] at 214.4 nm, dissolved in water

$t_R$  (main product): 7.6 min (100%)



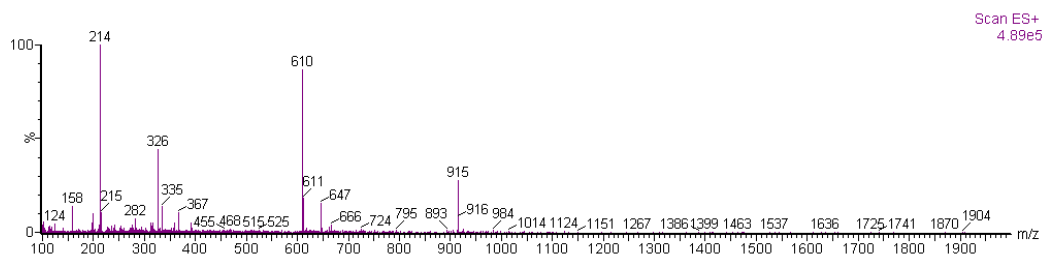

**Figure S8:** ESI-MS spectra of **Pep 4** [MOG<sub>4155</sub> (isoAsp<sup>53</sup>)]

MW<sub>theoretical</sub> (main product): 1827.12 Da

**(A)**

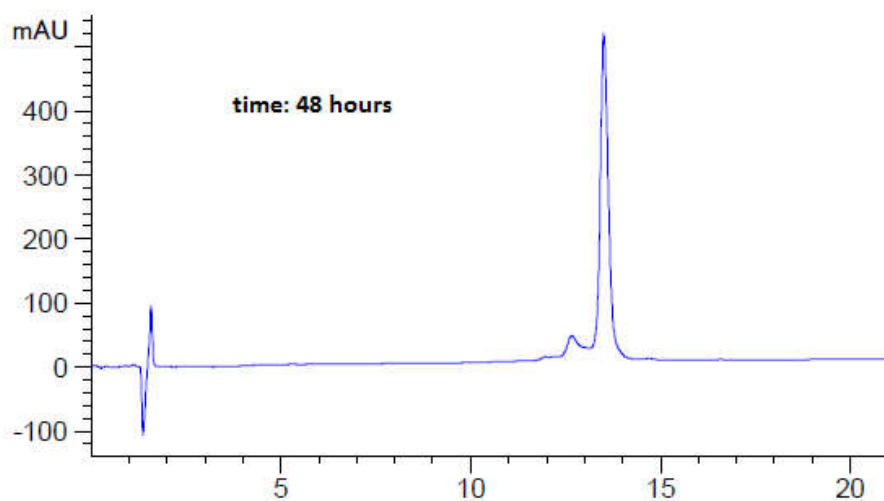

**(B)**

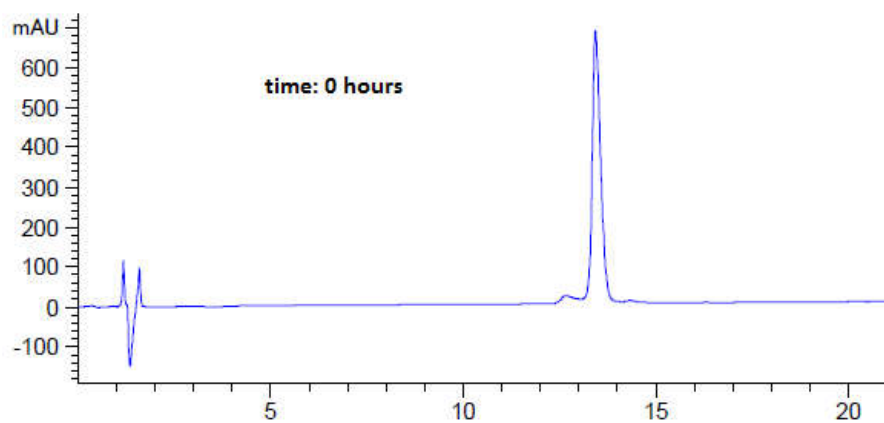

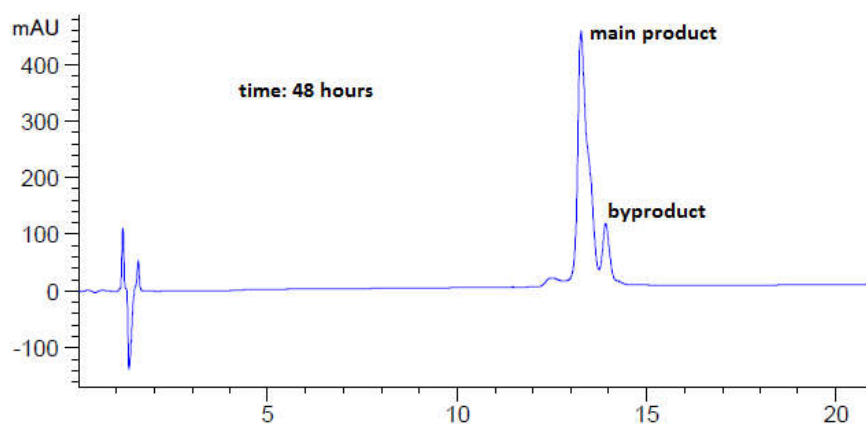

**Figure S9:** RP-HPLC chromatogram of **Pep 5** [(KG)<sub>5</sub>MOG<sub>3555</sub>] at 214.4 nm, at time zero and 48 h after dilution; **(A)** dissolved in water, **(B)** dissolved in bicarbonate buffer pH 9.0

$t_R$  (main product): 13.3 min (88.6%) and  $t_R$  (byproduct): 13.9 min (11.4%)

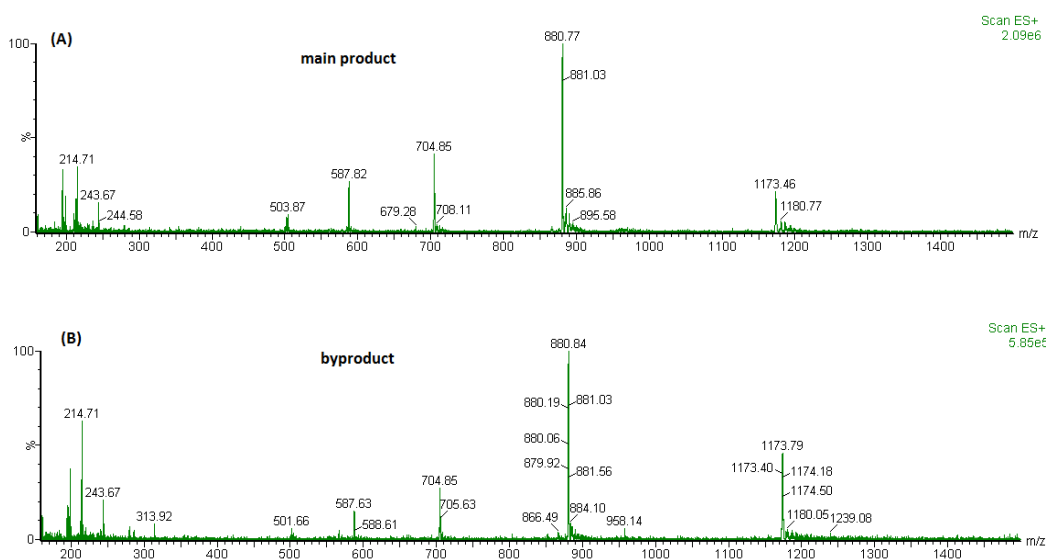

**Figure S10:** ESI-MS spectra of **Pep 5** [(KG)<sub>5</sub>MOG<sub>3555</sub>] dissolved in bicarbonate buffer, pH 9.0; of main product **(A)** and byproduct **(B)**

MW<sub>theoretical</sub> (main product): 3518.1 Da

(A)

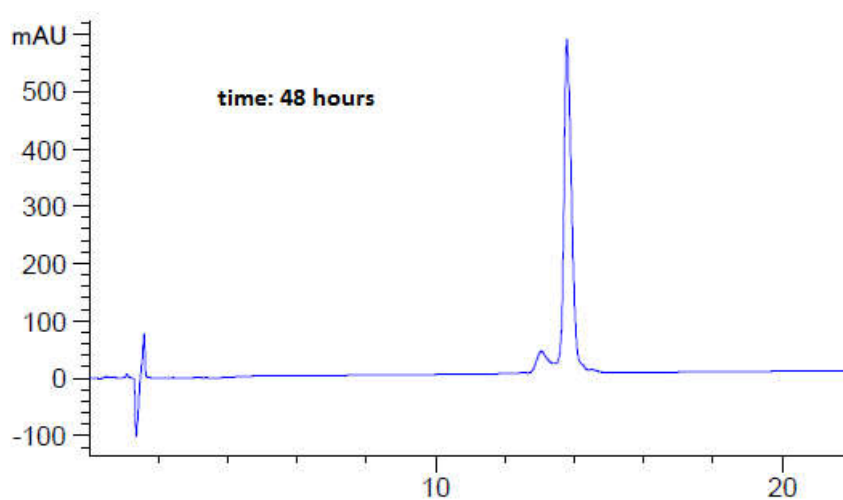

(B)

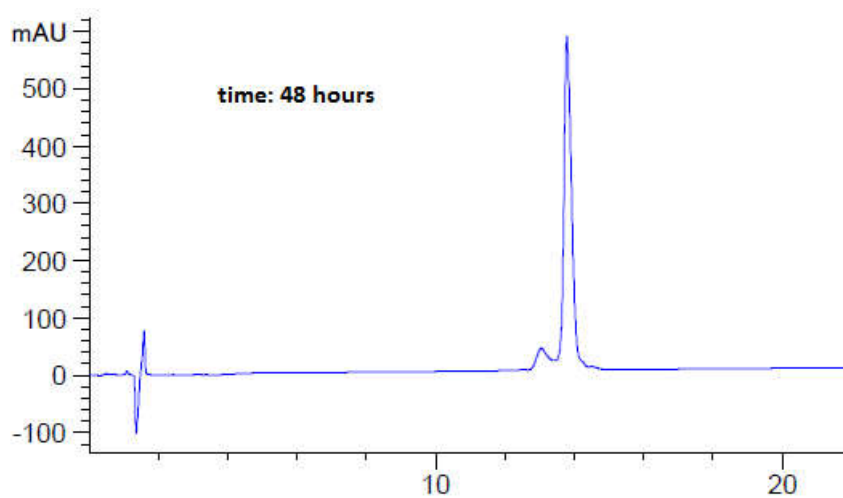

**Figure S11:** RP-HPLC chromatogram of **Pep 6** [(KG)<sub>5</sub>MOG<sub>3555</sub>(Asp<sup>53</sup>)] at 214.4 nm, at 48 h after dilution; **(A)** dissolved in water, **(B)** dissolved in bicarbonate buffer pH 9.0

$t_R$  (main product): 13.8 min

(A)

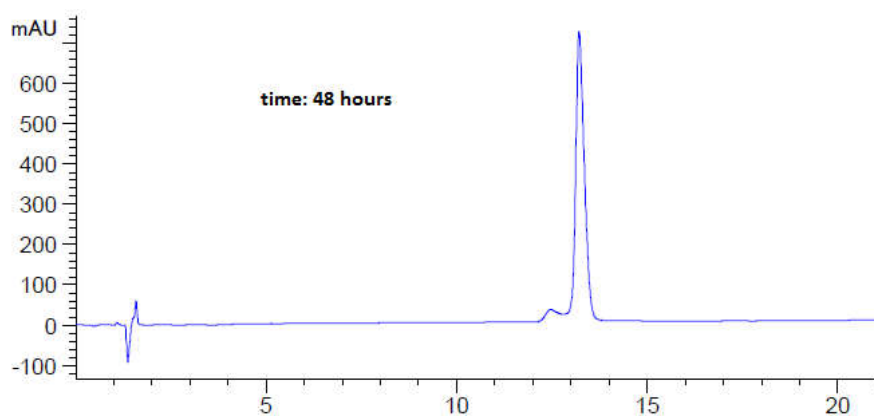

(B)

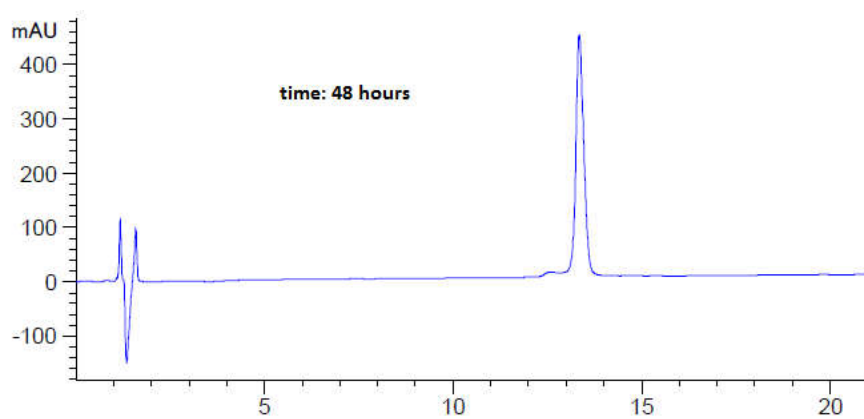

**Figure S12:** RP-HPLC chromatogram of **Pep 7** [(KG)<sub>5</sub>MOG<sub>3555</sub>(isoAsp<sup>53</sup>)] at 214.4nm, at 48 h after dilution; **(A)** dissolved in water, **(B)** dissolved in bicarbonate buffer pH 9.0

$t_R$  (main product): 13.3 min

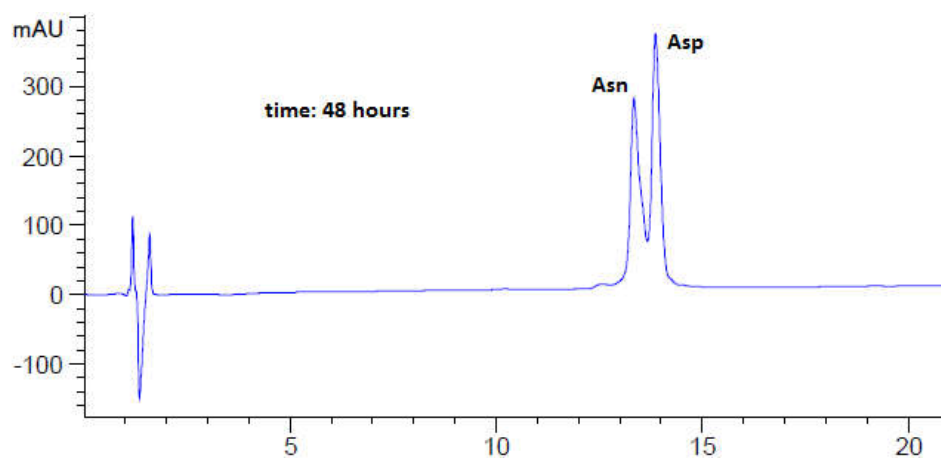

**Figure S13:** RP-HPLC chromatogram of co-injection [(KG)<sub>5</sub>MOG<sub>3555</sub>(Asn<sup>53</sup>)-  
(KG)<sub>5</sub>MOG<sub>3555</sub>(Asp<sup>53</sup>)] at 214.4 nm, at 48 h after dilution in bicarbonate buffer pH 9.0  
 $t_{R(\text{pep } 5)}$ : 13.3 min,  $t_{R(\text{pep } 6)}$ : 13.9 min

**(A)**

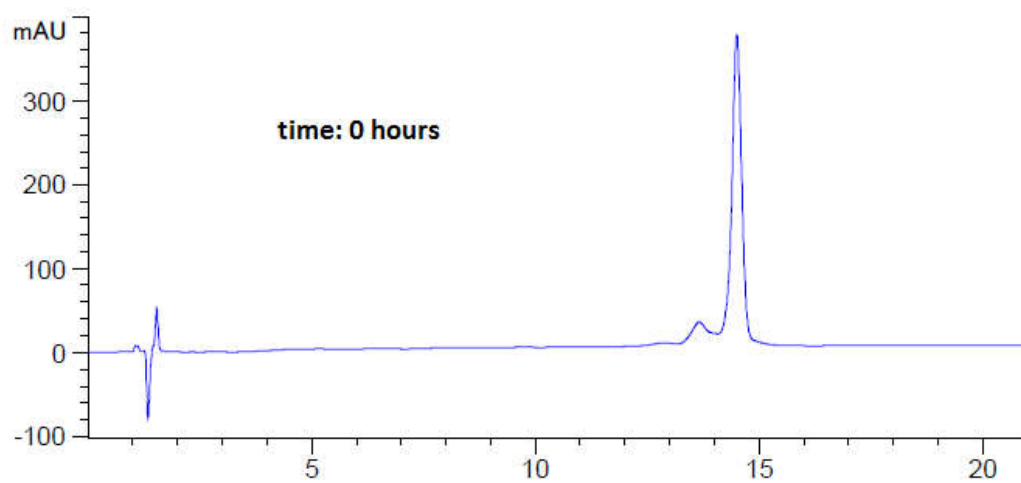

**(B)**

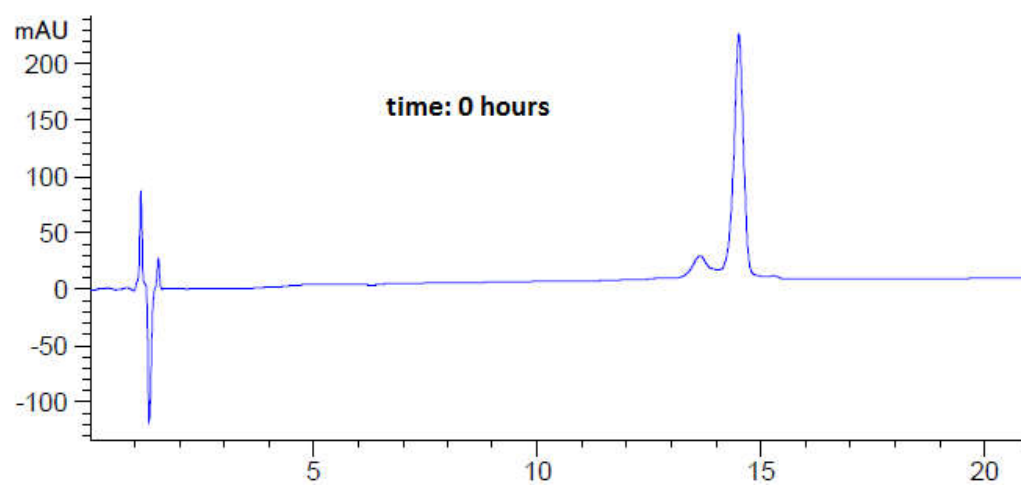

**Figure S14:** RP-HPLC chromatogram of Pep 8 [(KG)<sub>5</sub>MOG<sub>3555</sub>(Ser<sup>42</sup>)] at 214.4 nm, at time zero after dilution; **(A)** dissolved in water, **(B)** dissolved in bicarbonate buffer pH 9.0

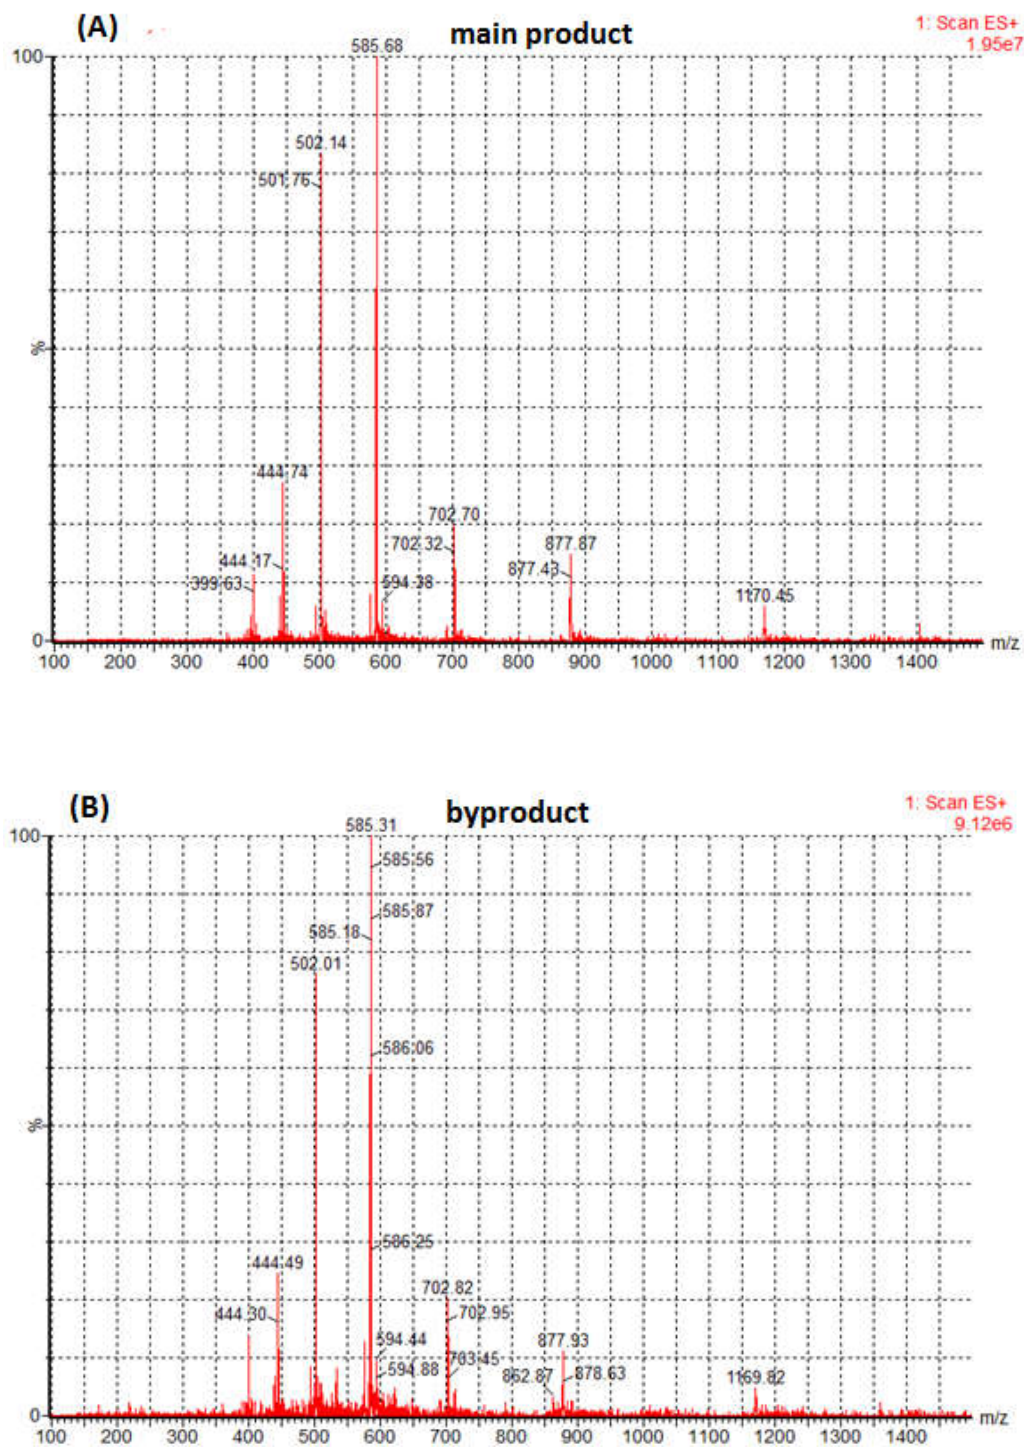

**Figure S15:** ESI-MS spectra of **Pep 8** [(KG)<sub>5</sub>MOG<sub>355</sub>(Ser<sup>42</sup>)] dissolved in bicarbonate buffer, pH 9.0; of main product **(A)** and byproduct **(B)**

MW theoretical (main product): 3508.07 Da

MW theoretical (by product): 3509.06 Da

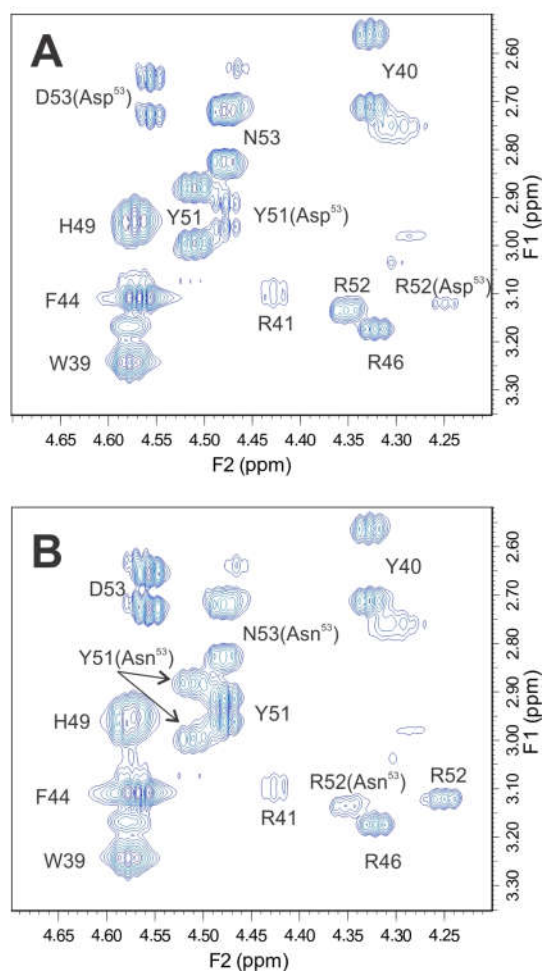

**Figure S16:** Expanded regions of TOCSY spectra of: **(A)** (KG)<sub>5</sub>MOG<sub>3555</sub> (**Pep 5**) and **(B)** isolated byproduct, after semipreparative-HPLC purification, (KG)<sub>5</sub>MOG<sub>3555</sub>(Asp<sup>53</sup>) (**Pep 6**) of (KG)<sub>5</sub>MOG<sub>3555</sub> (**Pep 5**) recorded in bicarbonate buffer, pH 9.0



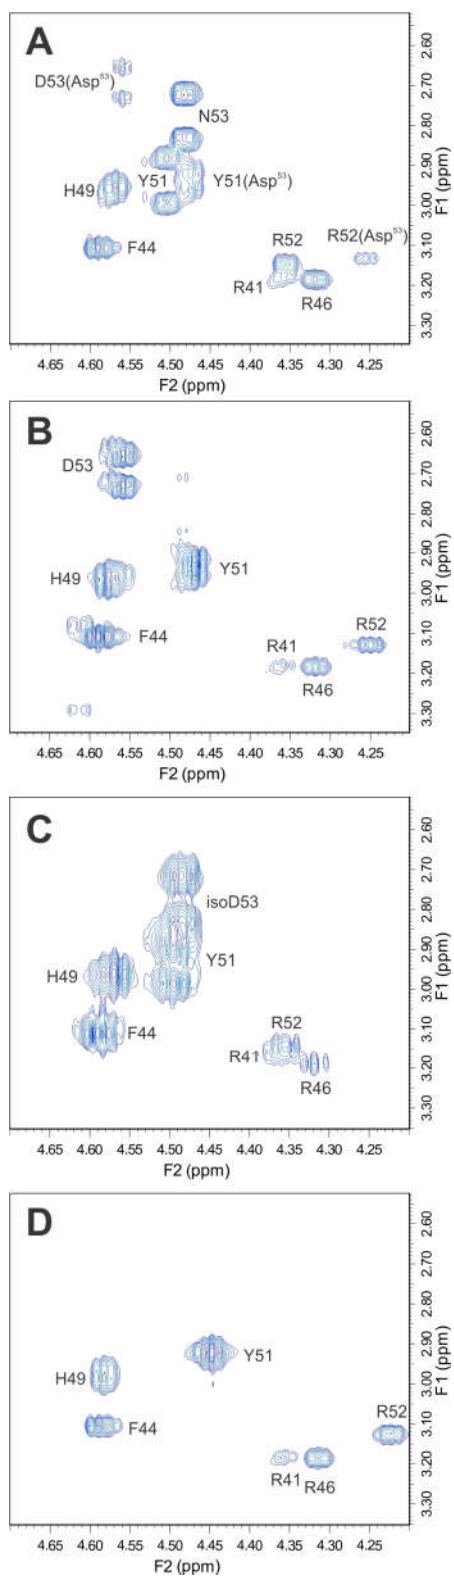

**Figure S17:** Expanded regions of TOCSY spectra of: **(A)** MOG<sub>4155</sub> (**Pep 1**), **(B)** MOG<sub>4155</sub>(Asp<sup>53</sup>) (**Pep 3**), **(C)** MOG<sub>4155</sub>(isoAsp<sup>53</sup>) (**Pep 4**) and **(D)** MOG<sub>4155</sub>(Ala<sup>53</sup>) (**Pep 2**) recorded in bicarbonate buffer, pH 9.0

**Table S1:** Chemical shifts in ppm of  $\alpha$ ,  $\beta$  protons of residues 51 and 53 and  $\alpha$ ,  $\delta$  protons of residue 52 for peptides 1 to 7 in bicarbonate buffer (pH 9.0) referenced according to DSS- $d_6$ . These chemical shifts define the position of representative cross-peaks in expanded TOCSY spectra (Figures 2, S16 and S17) relevant for the explanation of degradation of peptides containing Asn at position 53

|                                           | <b>Pep 1</b><br>MOG <sub>41-55</sub> |           | <b>Pep 2</b><br>MOG <sub>41-55</sub> (Ala <sup>53</sup> ) | <b>Pep 3</b><br>MOG <sub>41-55</sub> (Asp <sup>53</sup> ) | <b>Pep 4</b><br>MOG <sub>41-55</sub> (isoAsp <sup>53</sup> ) |
|-------------------------------------------|--------------------------------------|-----------|-----------------------------------------------------------|-----------------------------------------------------------|--------------------------------------------------------------|
|                                           | major                                | minor     |                                                           |                                                           |                                                              |
| Tyr51 H <sup><math>\alpha</math></sup>    | 4.50                                 | 4.47      | 4.45                                                      | 4.47                                                      | 4.50                                                         |
| Tyr51 H <sup><math>\beta</math></sup>     | 2.88 2.30                            | 2.92 2.95 | 2.92                                                      | 2.91 2.95                                                 | 2.86 2.98                                                    |
| Arg52 H <sup><math>\alpha</math></sup>    | 4.36                                 | 4.25      | 4.22                                                      | 4.25                                                      | 4.38                                                         |
| Arg52 H <sup><math>\delta</math></sup>    | 3.15                                 | 3.13      | 3.12                                                      | 3.12                                                      | 3.16                                                         |
| Asn53 H <sup><math>\alpha</math></sup>    | 4.48                                 |           |                                                           |                                                           |                                                              |
| Asn53 H <sup><math>\beta</math></sup>     | 2.72 2.83                            |           |                                                           |                                                           |                                                              |
| Asp53 H <sup><math>\alpha</math></sup>    |                                      | 4.56      |                                                           | 4.56                                                      |                                                              |
| Asp53 H <sup><math>\beta</math></sup>     |                                      | 2.66 2.73 |                                                           | 2.65 2.73                                                 |                                                              |
| isoAsp53 H <sup><math>\alpha</math></sup> |                                      |           |                                                           |                                                           | 4.48                                                         |
| isoAsp53 H <sup><math>\beta</math></sup>  |                                      |           |                                                           |                                                           | 2.72 2.84                                                    |

|                                           | <b>Pep 5</b><br>(KG) <sub>5</sub> MOG <sub>35-55</sub> |           | <b>isolated byproduct<br/>of Pep 5</b> |           | <b>Pep 6</b><br>(KG) <sub>5</sub> MOG <sub>35-55</sub> (Asp <sup>53</sup> ) | <b>Pep 7</b><br>(KG) <sub>5</sub> MOG <sub>35-55</sub> (isoAsp <sup>53</sup> ) |
|-------------------------------------------|--------------------------------------------------------|-----------|----------------------------------------|-----------|-----------------------------------------------------------------------------|--------------------------------------------------------------------------------|
|                                           | major                                                  | minor     | major                                  | minor     |                                                                             |                                                                                |
| Tyr51 H <sup><math>\alpha</math></sup>    | 4.51                                                   | 4.48      | 4.48                                   | 4.51      | 4.48                                                                        | 4.52                                                                           |
| Tyr51 H <sup><math>\beta</math></sup>     | 2.30, 2.88                                             | 2.91 2.96 | 2.91 2.96                              | 2.30 2.88 | 2.91 2.96                                                                   | 2.88 3.00                                                                      |
| Arg52 H <sup><math>\alpha</math></sup>    | 4.35                                                   | 4.25      | 4.25                                   | 4.35      | 4.25                                                                        | 4.35                                                                           |
| Arg52 H <sup><math>\delta</math></sup>    | 3.13                                                   | 3.12      | 3.12                                   | 3.13      | 3.12                                                                        | 3.13                                                                           |
| Asn53 H <sup><math>\alpha</math></sup>    | 4.48                                                   |           |                                        | 4.48      |                                                                             |                                                                                |
| Asn53 H <sup><math>\beta</math></sup>     | 2.72 2.82                                              |           |                                        | 2.72 2.83 |                                                                             |                                                                                |
| Asp53 H <sup><math>\alpha</math></sup>    |                                                        | 4.56      | 4.56                                   |           | 4.56                                                                        |                                                                                |
| Asp53 H <sup><math>\beta</math></sup>     |                                                        | 2.65 2.73 | 2.65 2.73                              |           | 2.66 2.73                                                                   |                                                                                |
| isoAsp53 H <sup><math>\alpha</math></sup> |                                                        |           |                                        |           |                                                                             | 4.48                                                                           |
| isoAsp53 H <sup><math>\beta</math></sup>  |                                                        |           |                                        |           |                                                                             | 2.72 2.82                                                                      |
